# Supplementary material for: Text Mining Analysis to Evaluate Stakeholders’ Perception Regarding Welfare of Equines, Small Ruminants, and Turkeys
Source: MDPI journal article supplement (doi:10.3390/ani9050225), 2019-05-08
Supplement: s1 [file s1]

**Table S1.** List of the questions reported in the questionnaire.

| Questionnaire                                                                                                                                                                                                                                                                                                                                                      |
|--------------------------------------------------------------------------------------------------------------------------------------------------------------------------------------------------------------------------------------------------------------------------------------------------------------------------------------------------------------------|
| In your opinion, what do sheep/goats/turkeys/donkeys/horses need to be fit, healthy and productive?                                                                                                                                                                                                                                                                |
| Behavior: How does a sheep/goat/turkey/donkey/horse act and react in each of the following situations?                                                                                                                                                                                                                                                             |
| <ul style="list-style-type: none"><li>- In the presence of a noise, a sheep/goat/turkey/donkey/horse</li><li>- Isolated from the group, a sheep/goat/turkey/donkey/horse</li><li>- In the presence of animals / persons known, a sheep/goat/turkey/donkey/horse</li><li>- In the presence of unknown animals / persons, a sheep/goat/turkey/donkey/horse</li></ul> |
| Perception: How could a sheep/goat/turkey/donkey/horse feel in each of the following situations?                                                                                                                                                                                                                                                                   |
| <ul style="list-style-type: none"><li>- In the presence of a noise, sheep/goat/turkey/donkey/horse</li><li>- Isolated from the flock, a sheep/goat/turkey/donkey/horse</li><li>- In the presence of animals / persons known, a sheep/goat/turkey/donkey/horse</li><li>- In the presence of unknown animals / persons, a sheep/goat/turkey/donkey/horse</li></ul>   |
| Looking at your neighbour's sheep/goat/turkey/donkey/horse, which signs would you observe to assess:                                                                                                                                                                                                                                                               |
| <ul style="list-style-type: none"><li>- The conditions of accommodation</li><li>- Feeding conditions</li><li>- Health conditions</li><li>- The manifestation of normal behavior</li><li>- The manifestation of abnormal behavior</li></ul>                                                                                                                         |
